# Supplementary material for: TECRL deficiency results in aberrant mitochondrial function in cardiomyocytes
Source: PubMed Central journal article supplement (PMC9110732; doi:10.1038/s42003-022-03414-9), 2022-05-16
Supplement: 42003_2022_3414_MOESM2_ESM.pdf [file 42003_2022_3414_MOESM2_ESM.pdf]

1 Figure legends

2 Fig S1. *Tecrl* deficiency did not induce cardiac dysfunction at four to five weeks of age.

3 (a) Representative echocardiography images of WT and *Tecrl* KO mice at the age of  
4 four to five weeks. (b) Quantification of LVEF, LVFS, LVIDd, LVIDs, LVEDV, and  
5 LVESV in WT and *Tecrl* KO mice (four to five weeks) ( $n = 6$ ). (c) Representative  
6 immunoblotting images of TECRL of the patient and his parents. Values are mean  $\pm$  SE.  
7  $P < 0.05$  was considered significant.

8

9 Fig S2. *Tecrl* deficiency increases reactive oxygen species production. (a, b)

10 Representative images of the DHE staining and statistical charts. The WT and *Tecrl* KO  
11 mouse tissues were measured at the age of four to five weeks ( $n = 6$ ). Values are mean  
12  $\pm$  SE.  $P < 0.05$  was considered significant.

13

14 Fig S3. Visualization of differentially regulated proteins in mitochondria isolated from  
15 the WT and *Tecrl* KO mice hearts. (a) Volcano plots of differentially regulated proteins  
16 in cardiac mitochondria, those achieving  $P < 0.05$  and  $|\text{fold-change}| > 1.3$  are  
17 highlighted. (b) KEGG enrichment analysis of the differentially expressed proteins in  
18 WT and *Tecrl* KO mouse mitochondria.

19

20 Fig S4. Overexpression of TECRL can induce mitochondrial respiration in H9C2 cells.

21 (a-d) The relative mRNA levels of NRF2, FAS, MFN2, and TECRL in H9C2 cells after  
22 siTECRL treatment ( $n = 6$ ). (e-g) Measure of OCR and respective quantitative analysis  
23 in H9C2 cells ( $n = 12$ ), FCCP, trifluoromethoxy carbonyl cyanide phenylhydrazine.  
24 Values are mean  $\pm$  SE.  $P < 0.05$  was considered significant.

25

26 Fig S5. TECRL effects on NRF2, MFN2, and FAS in H9C2. (a-c) Representative  
27 immunoblotting images and quantification of the expression of NRF2, MFN2, FAS,  
28 and TECRL in H9C2 following TECRL knockdown using siRNA ( $n=8$ ). Values are  
29 mean  $\pm$  SE.  $P < 0.05$  was considered significant.

30

31 Fig S6. Construction of the Tecrl KO mice. (a) The location of the primers. (b) The  
32 sequence of the primers.

33

34 Table information

35 Table S1. The relative protein expression of WT and Tecrl KO mouse hearts through  
36 mass spectrometry.

37

38 Table S2. The relative differential expression of genes in WT and Tecrl KO mouse  
39 hearts through RNA-sequencing.

40

41 Table S3. A total of 306 (16.2%) cardiac proteins were differentially expressed in Tecrl  
42 KO mice relative to WT, observed through mitochondrial proteomics detection.

43

44 Table S4. Baseline of contraction of TECRL knockdown hiPSC-CMs versus baseline.

45

46 Table S5. All the expression of proteins after TECRL overexpression in the hiPSC-CMs  
47 through mass spectrometry.

48

49 Table S6. All the expression of proteins after co-immunoprecipitation overexpressed by  
50 TECRL in the hiPSC-CMs through mass spectrometry.

51

52 Video S1. The representative video of cardiomyocytes (hiPSC-CMs) beating  
53 spontaneously.

54

55

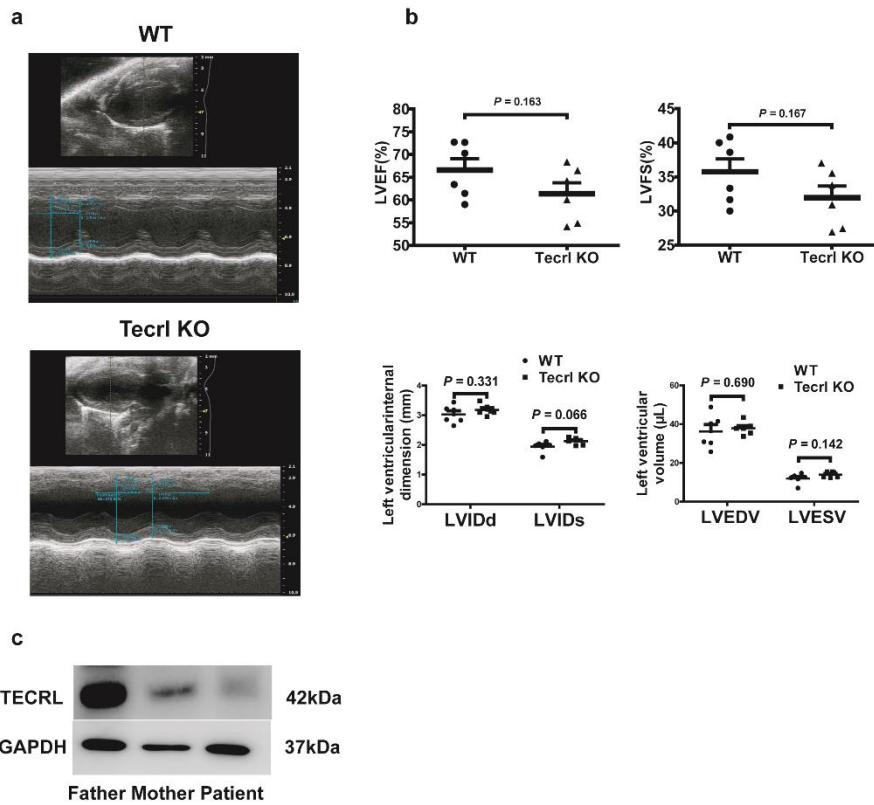

56

57 Fig S1. *Tecrl* deficiency did not induce cardiac dysfunction at four to five weeks of age.

58 (a) Representative echocardiography images of WT and *Tecrl* KO mice at the age of

59 four to five weeks. (b) Quantification of LVEF, LVFS, LVIDd, LVIDs, LVEDV, and

60 LVESV in WT and *Tecrl* KO mice (four to five weeks) ( $n = 6$ ).

61 (c) Representative immunoblotting images of TECRL of the patient and his parents. Values are mean  $\pm$  SE.

62  $P < 0.05$  was considered significant.

63

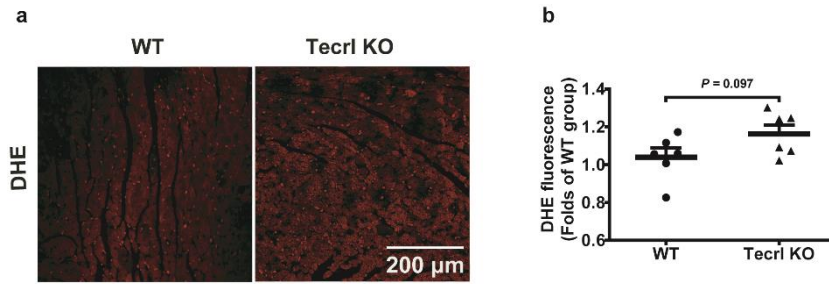

64

65 Fig S2. *Tecr1* deficiency increases reactive oxygen species production. (a, b)

66 Representative images of the DHE staining and statistical charts. The WT and *Tecr1* KO

67 mouse tissues were measured at the age of four to five weeks ( $n = 6$ ). Values are mean

68  $\pm$  SE.  $P < 0.05$  was considered significant.

69

a

Volcano (WT vs. Tecrl KO )

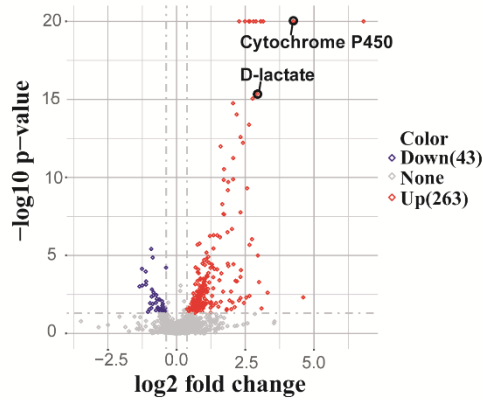

b

KEGG Pathway Plot (WT vs. Tecrl KO)

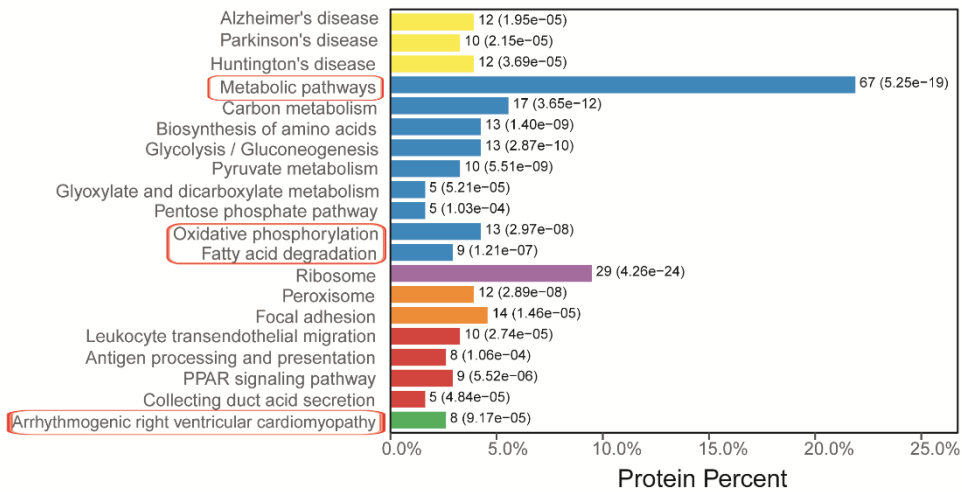

70

71 Fig S3. Visualization of differentially regulated proteins in mitochondria isolated from  
 72 the WT and Tecrl KO mice hearts. (a) Volcano plots of differentially regulated proteins  
 73 in cardiac mitochondria, those achieving  $P < 0.05$  and  $|\text{fold-change}| > 1.3$  are  
 74 highlighted. (b) KEGG enrichment analysis of the differentially expressed proteins in  
 75 WT and Tecrl KO mouse mitochondria.

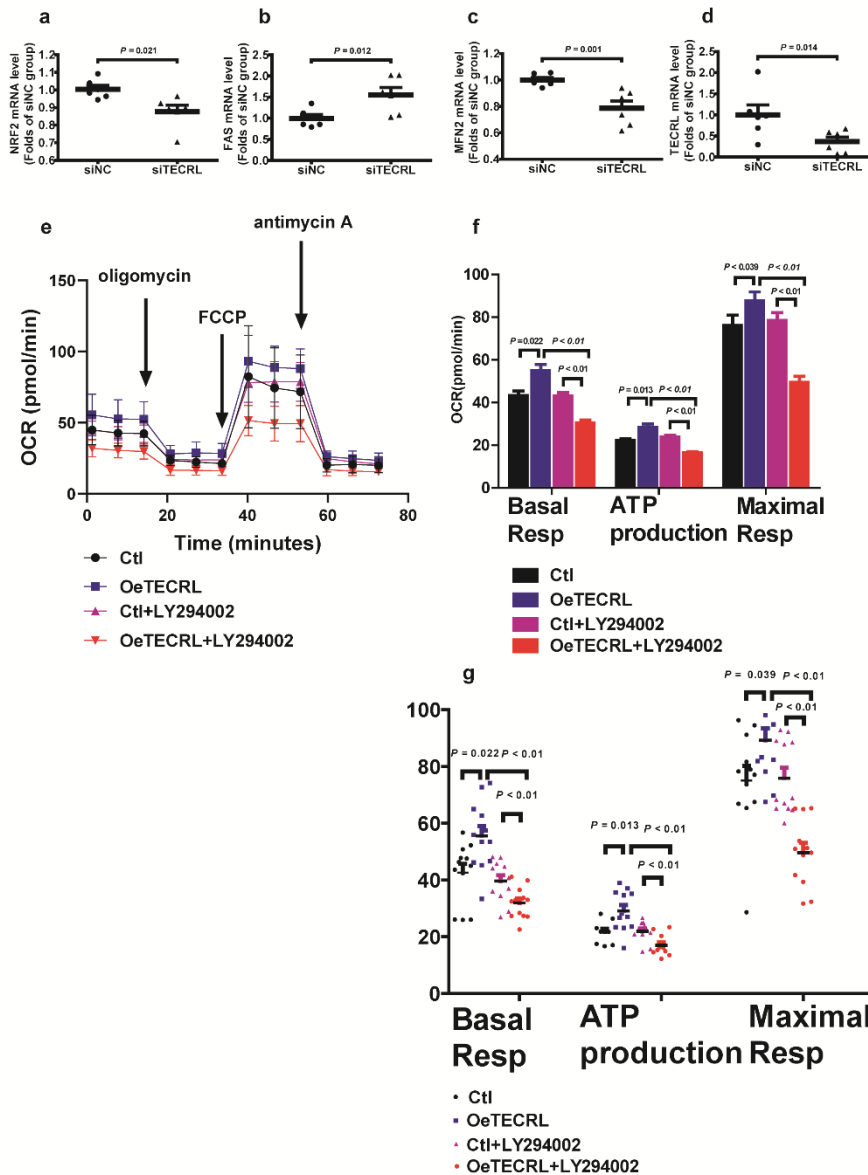

76

77 Fig S4. Overexpression of TECRL can induce mitochondrial respiration in H9C2 cells.

78 (a-d) The relative mRNA levels of NRF2, FAS, MFN2, and TECRL in H9C2 cells after

79 siTECRL treatment (n = 6). (e-g) Measure of OCR and respective quantitative analysis

80 in H9C2 cells (n = 12), FCCP, trifluoromethoxy carbonyl cyanide phenylhydrazine.

81 Values are mean  $\pm$  SE.  $P < 0.05$  was considered significant.

82

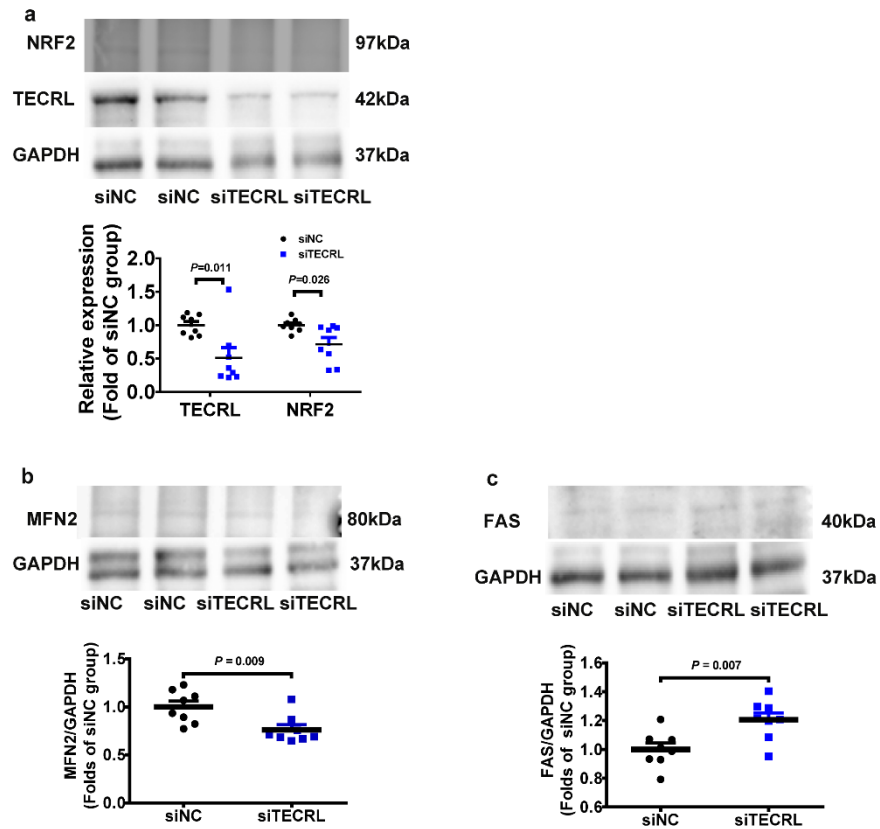

83

84 Fig S5. TECRL effects on NRF2, MFN2, and FAS in H9C2. (a-c) Representative  
 85 immunoblotting images and quantification of the expression of NRF2, MFN2, FAS,  
 86 and TECRL in H9C2 following TECRL knockdown using siRNA (n=8). Values are  
 87 mean  $\pm$  SE.  $P < 0.05$  was considered significant.

88

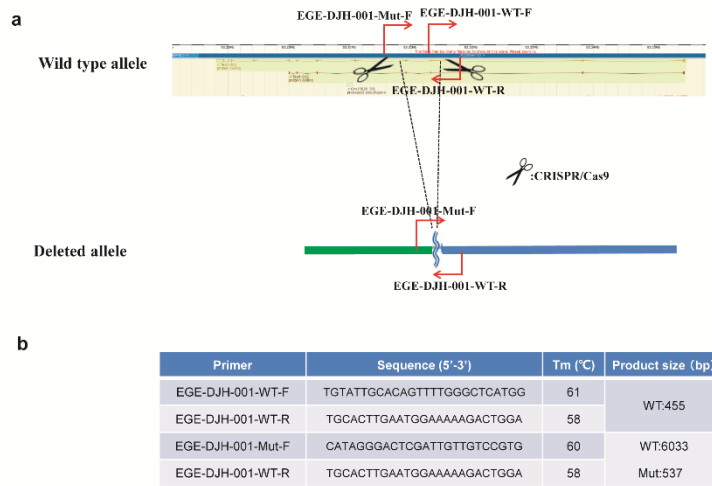

89

90 Fig S6. Construction of the *Tecl1* KO mice. (a) The location of the primers. (b) The  
 91 sequence of the primers.

92



93 Supplementary figure of uncropped blots

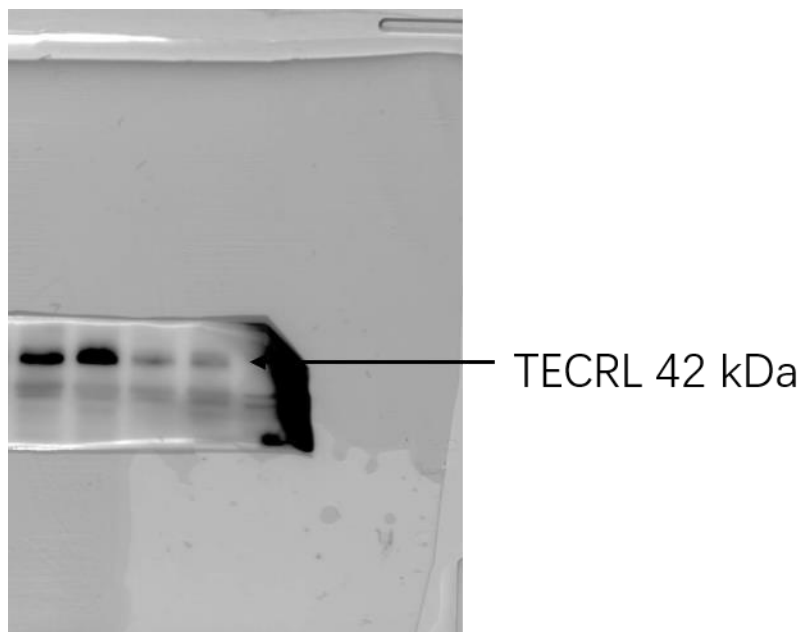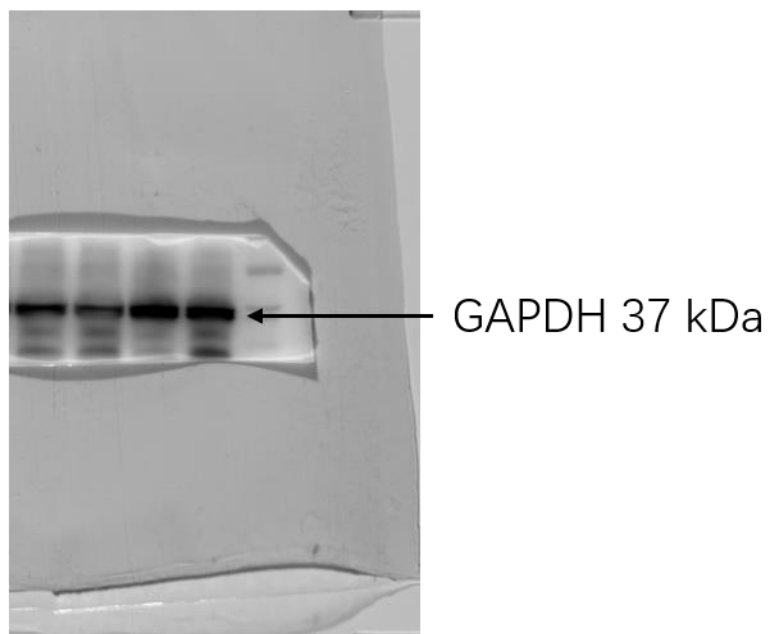

94

95 Fig S7. Uncropped blots of Fig 1e.

96

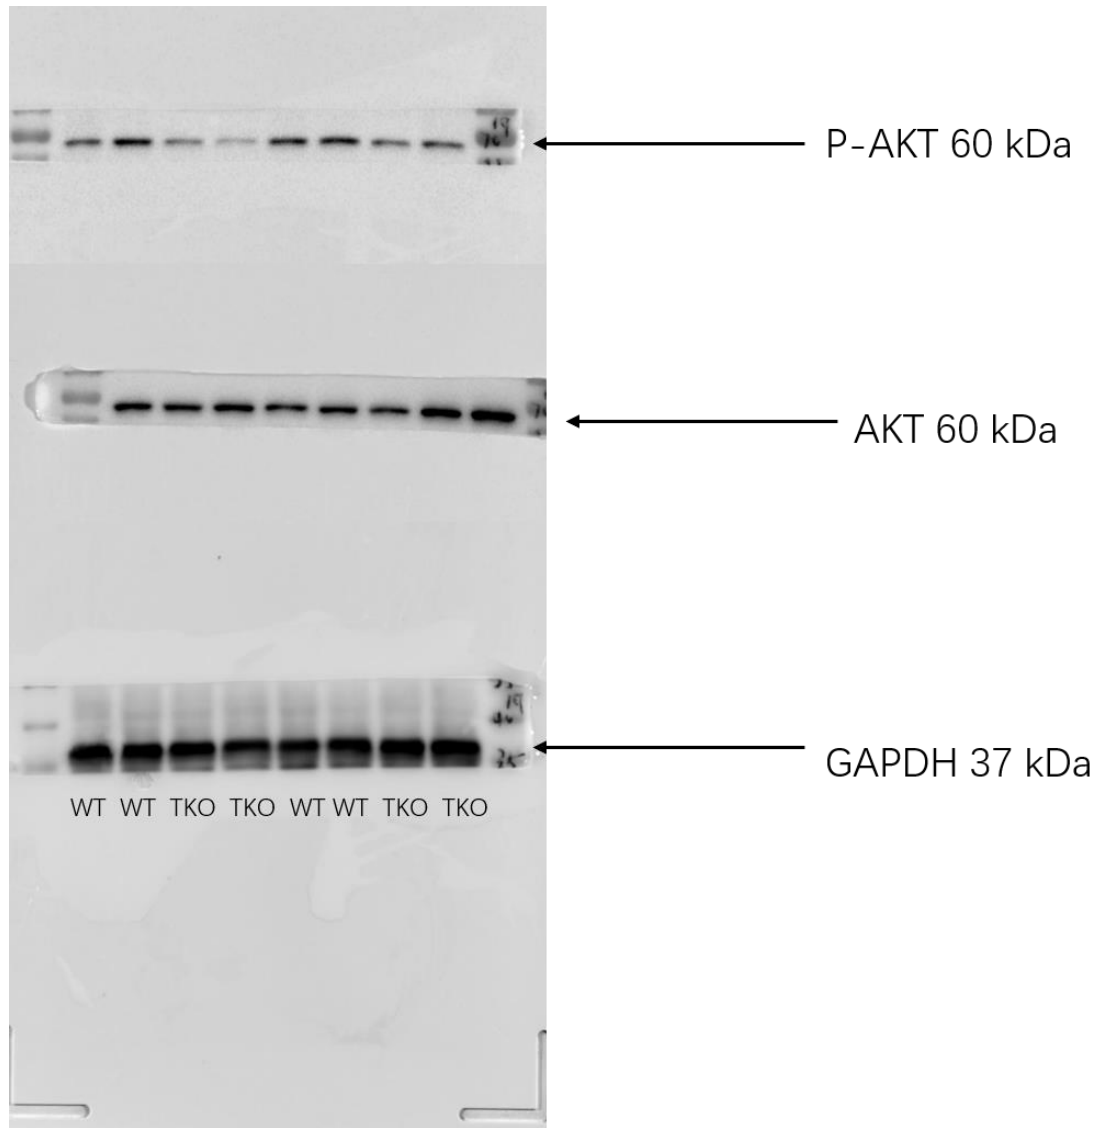

97

98 Fig S7. Uncropped blots of Fig 5a.

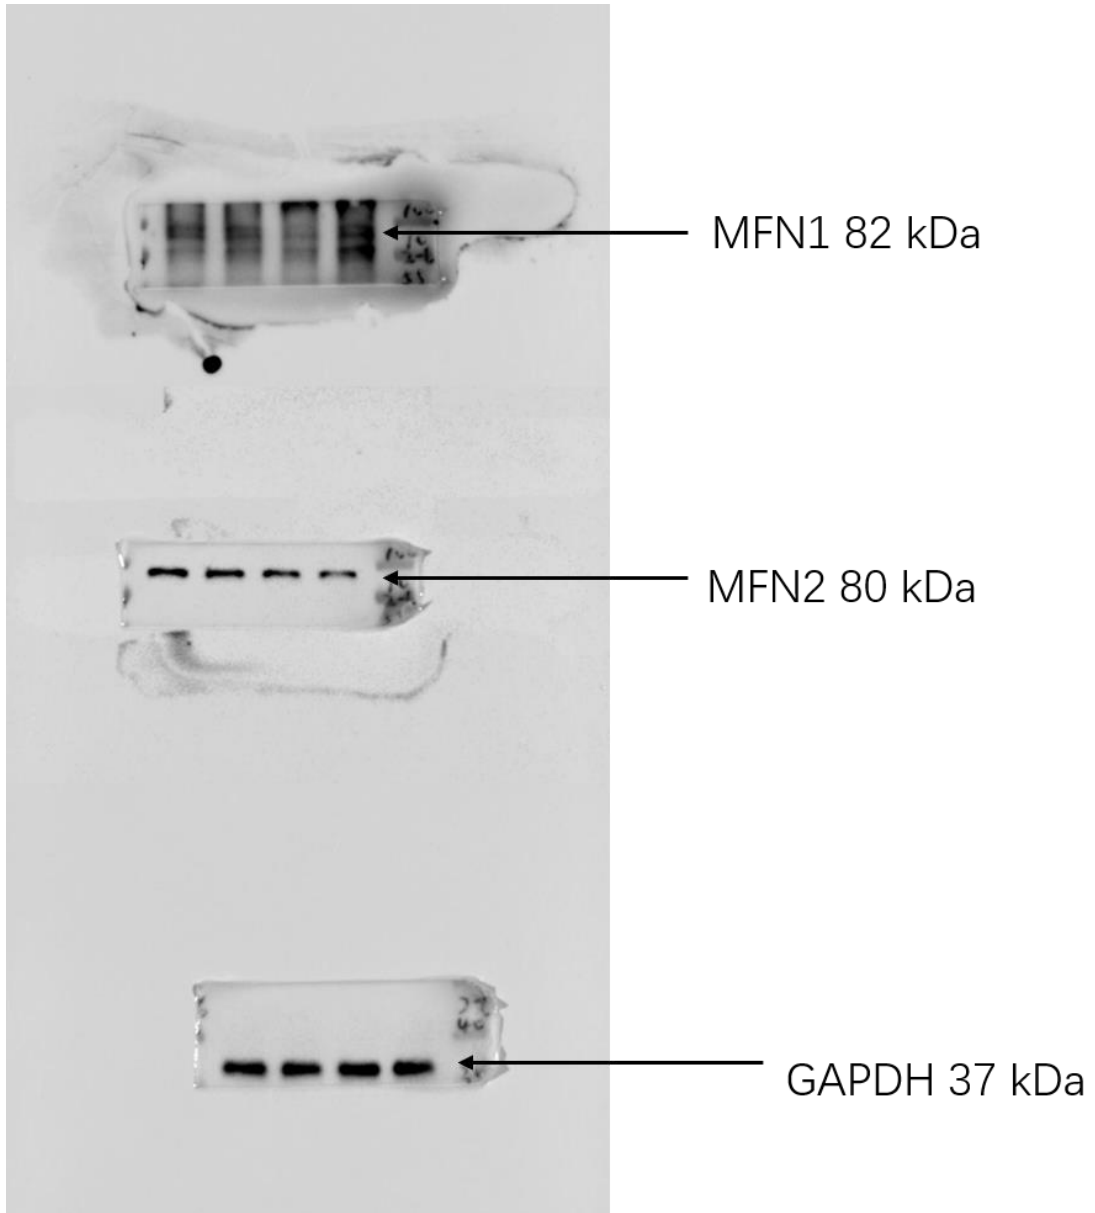

99

100 Fig S7. Uncropped blots of Fig 5b.

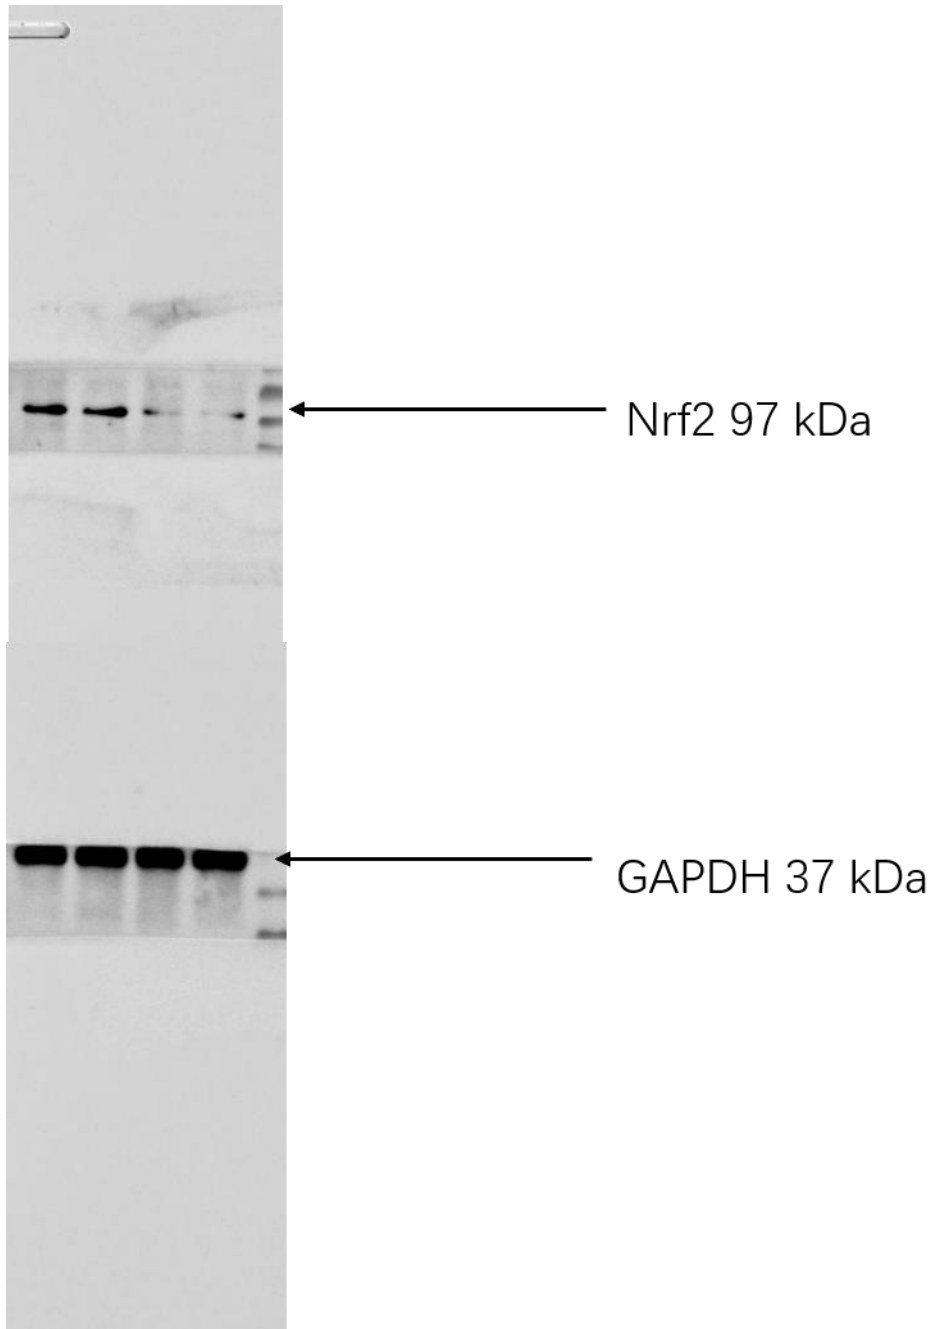

101

102 Fig S7. Uncropped blots of Fig 5c.

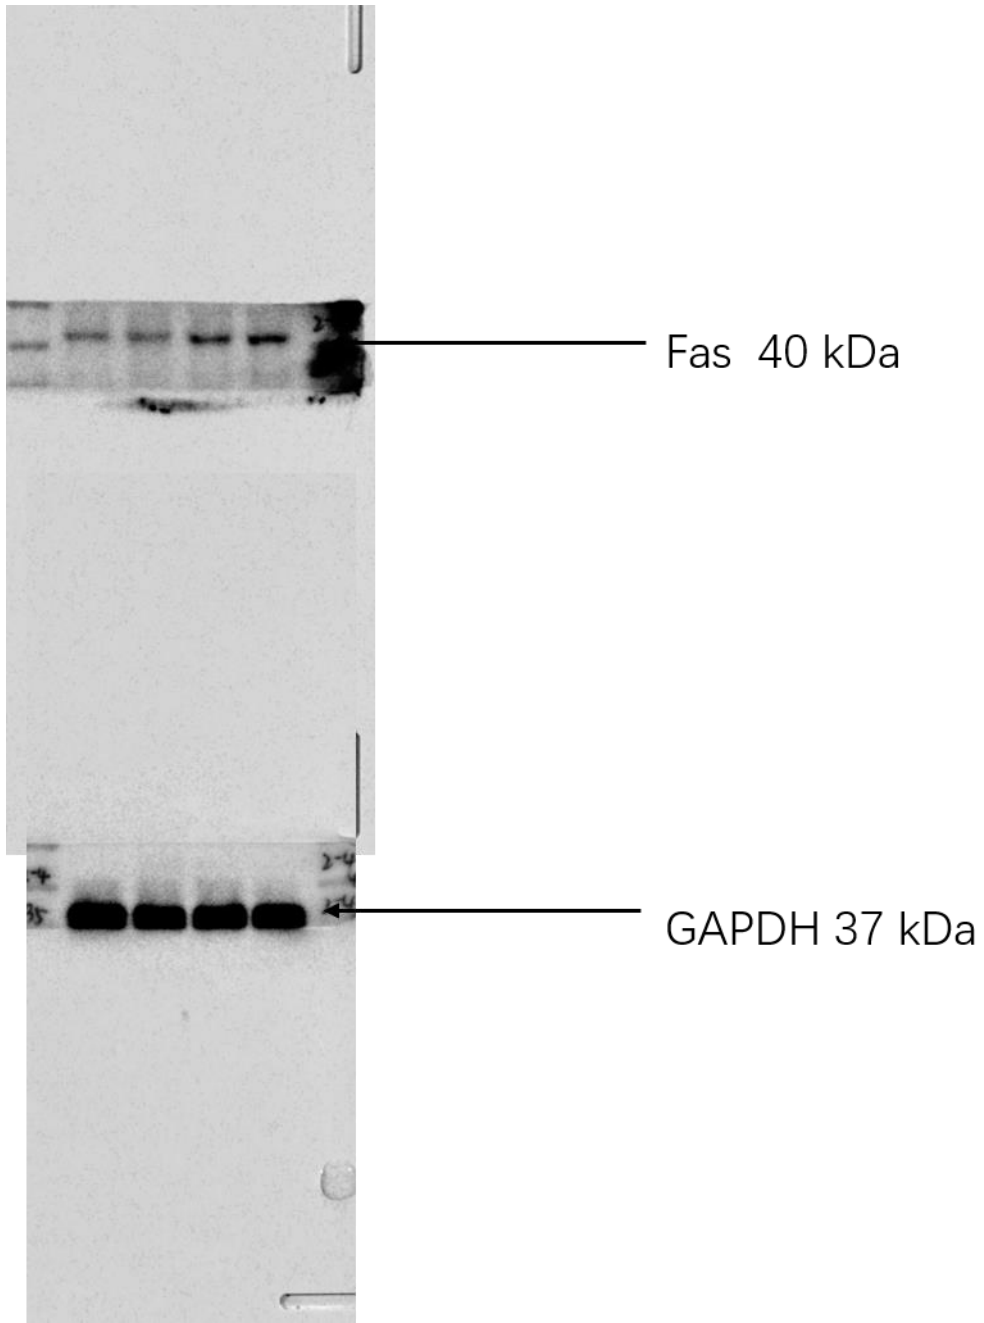

103

104 Fig S7. Uncropped blots of Fig 5d.

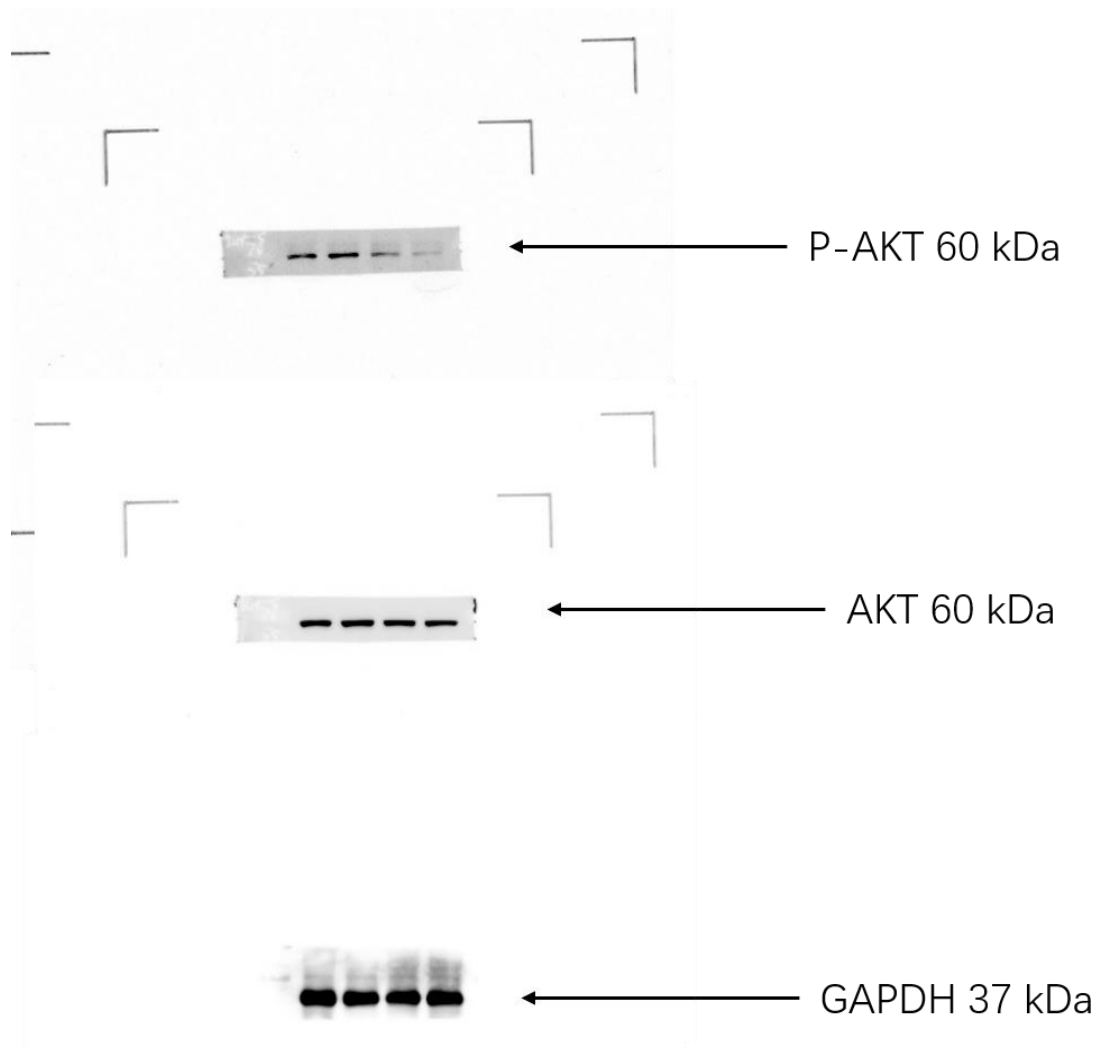

105

106 Fig S7. Uncropped blots of Fig 6d.

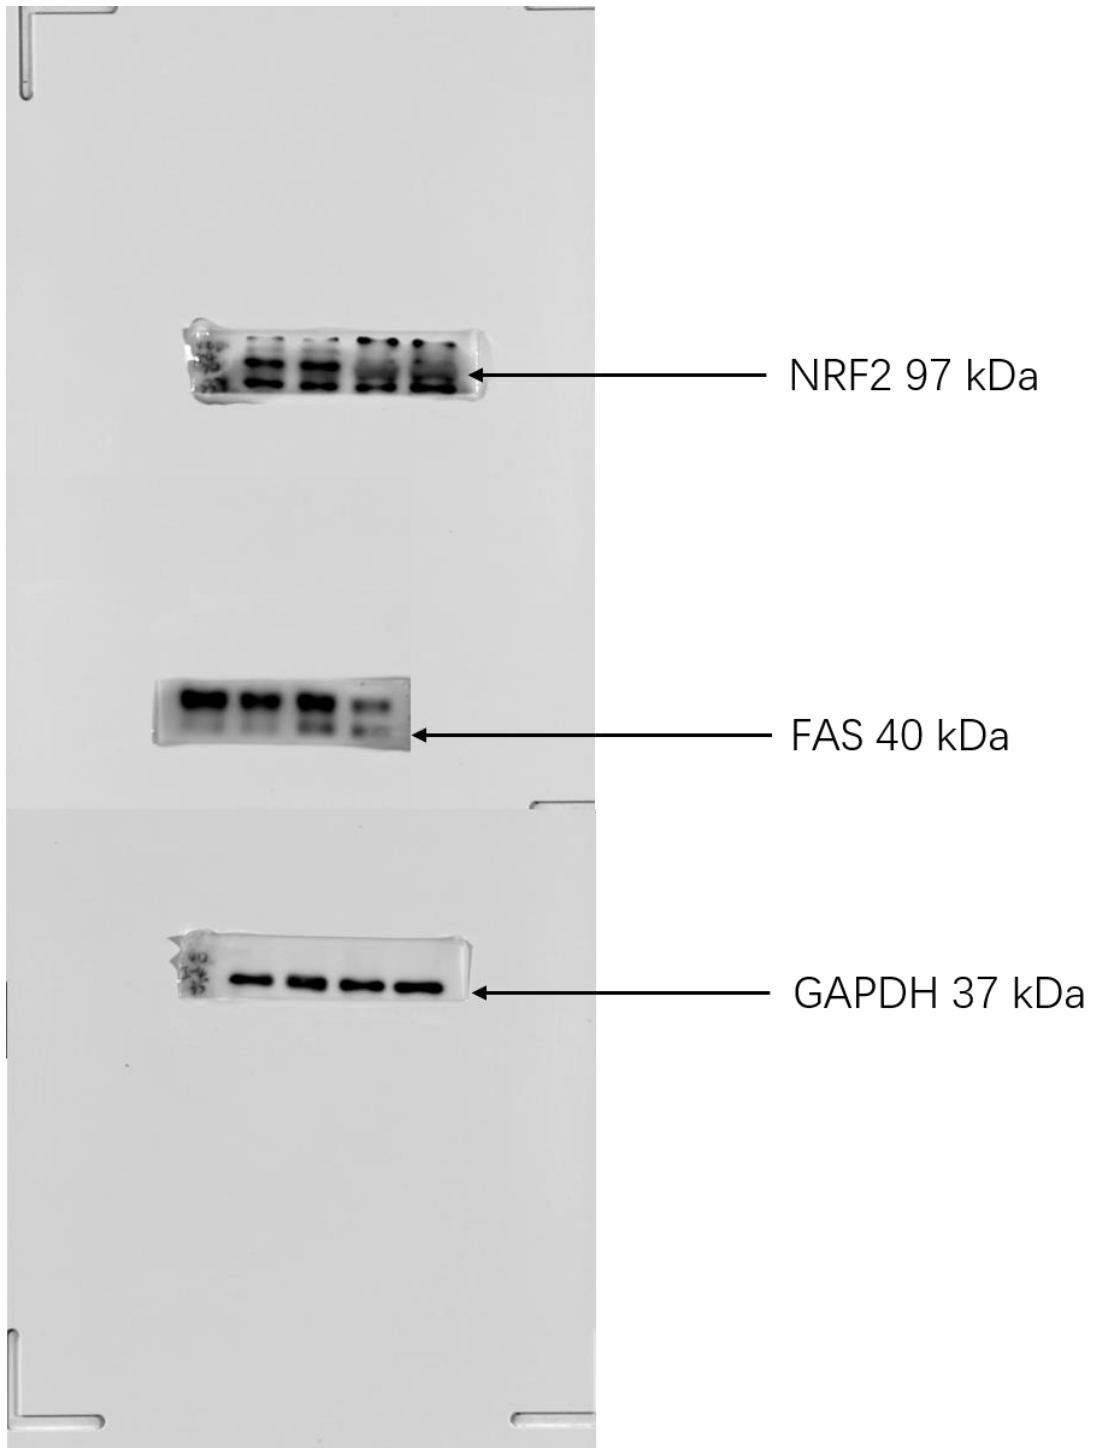

107

108 Fig S7. Uncropped blots of Fig 6e.

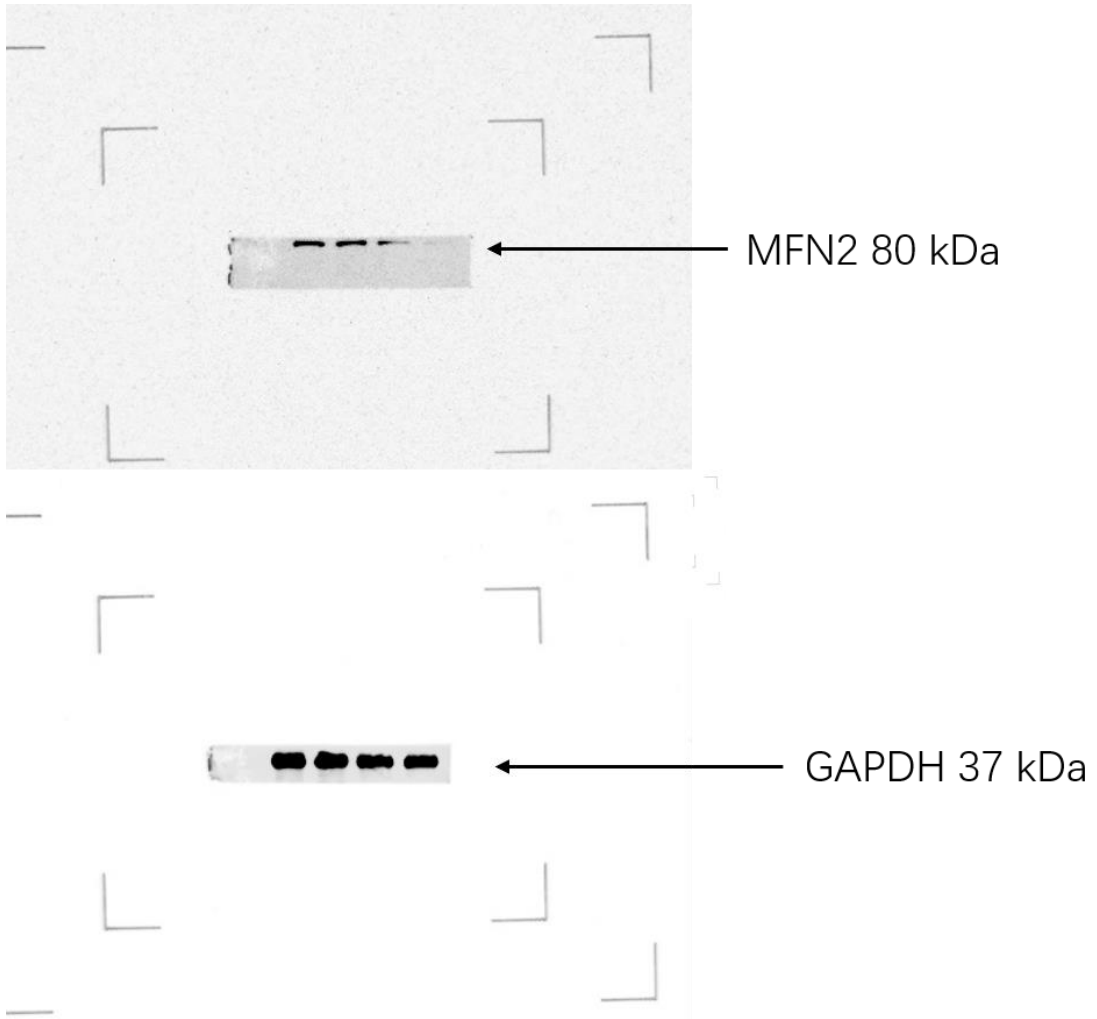

109

110 Fig S7. Uncropped blots of Fig 6f.



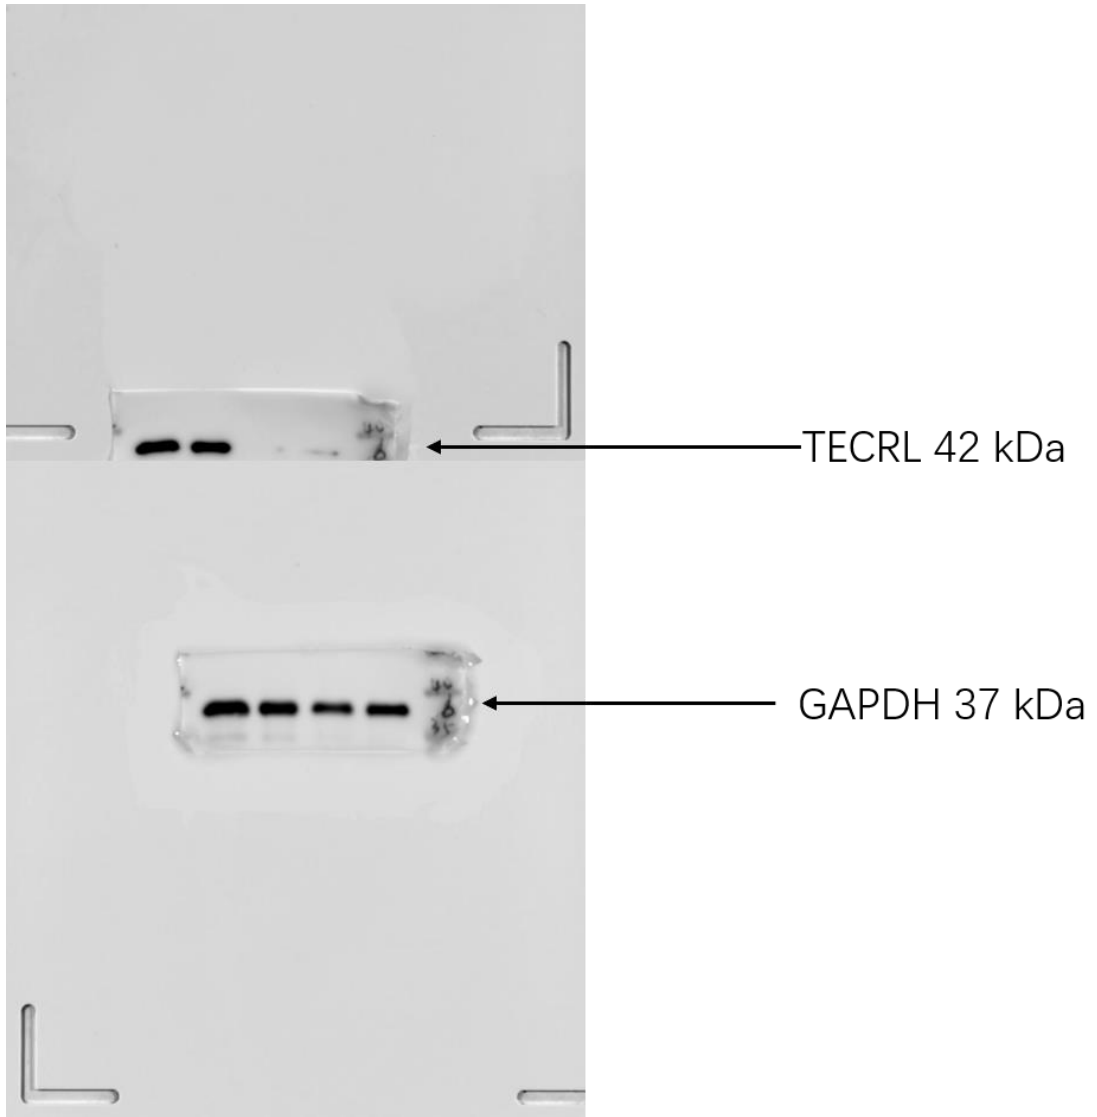

111

112 Fig S7. Uncropped blots of Fig 6g.

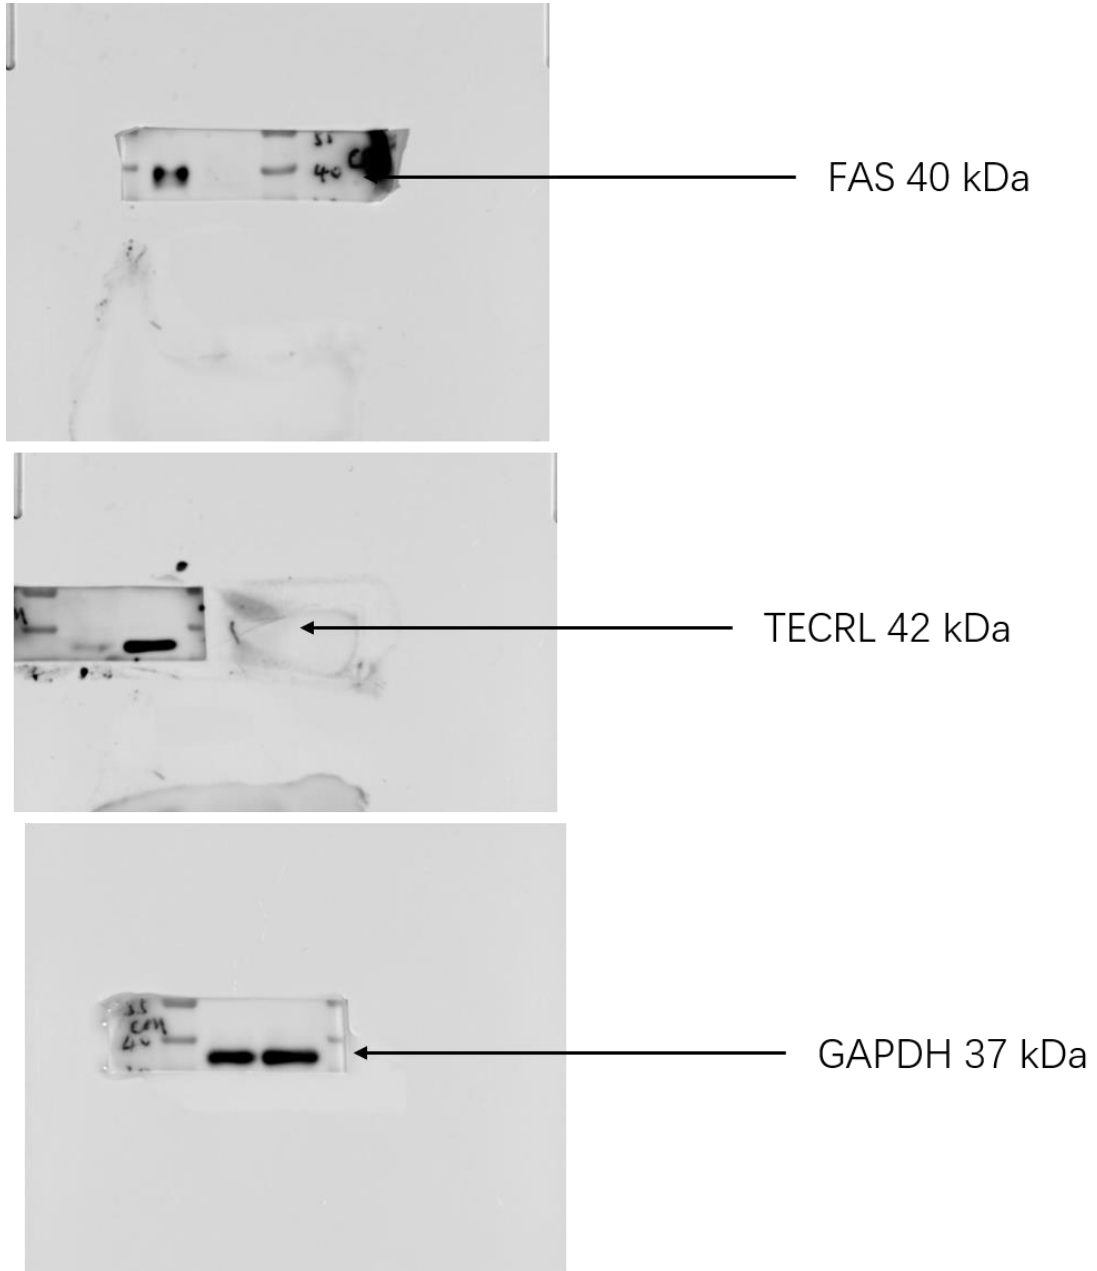

113

114 Fig S7. Uncropped blots of Fig 7a.

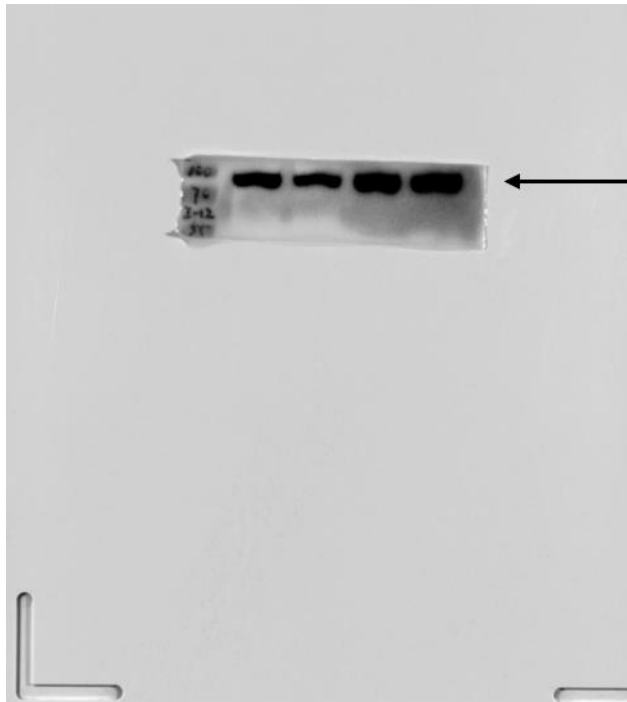

MFN2 80 kDa

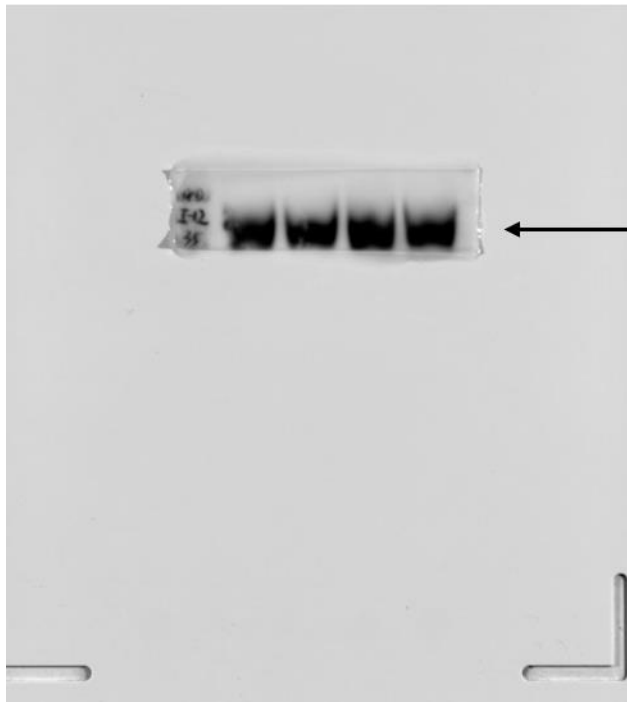

GAPDH 37 kDa

115

116 Fig S7. Uncropped blots of Fig 7b.

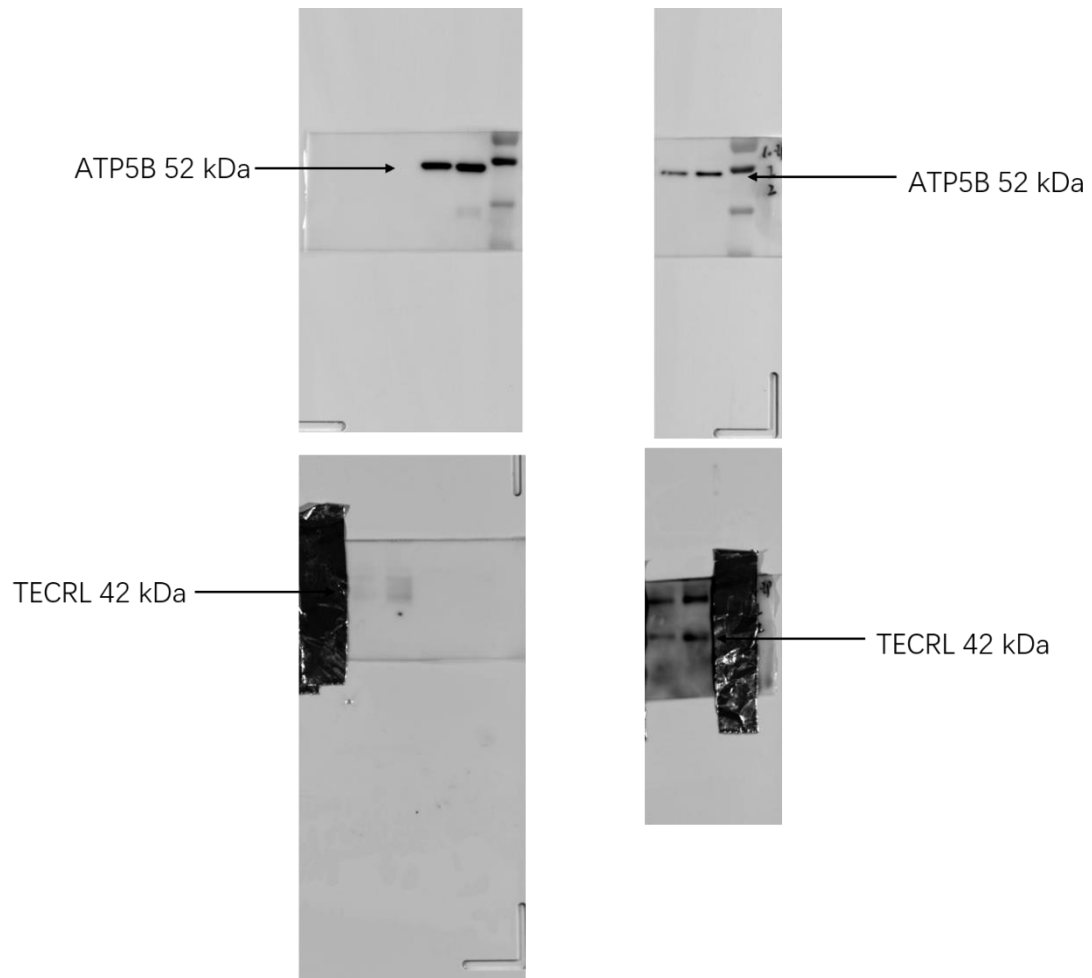

117

118 Fig S7. Uncropped blots of Fig 7c.

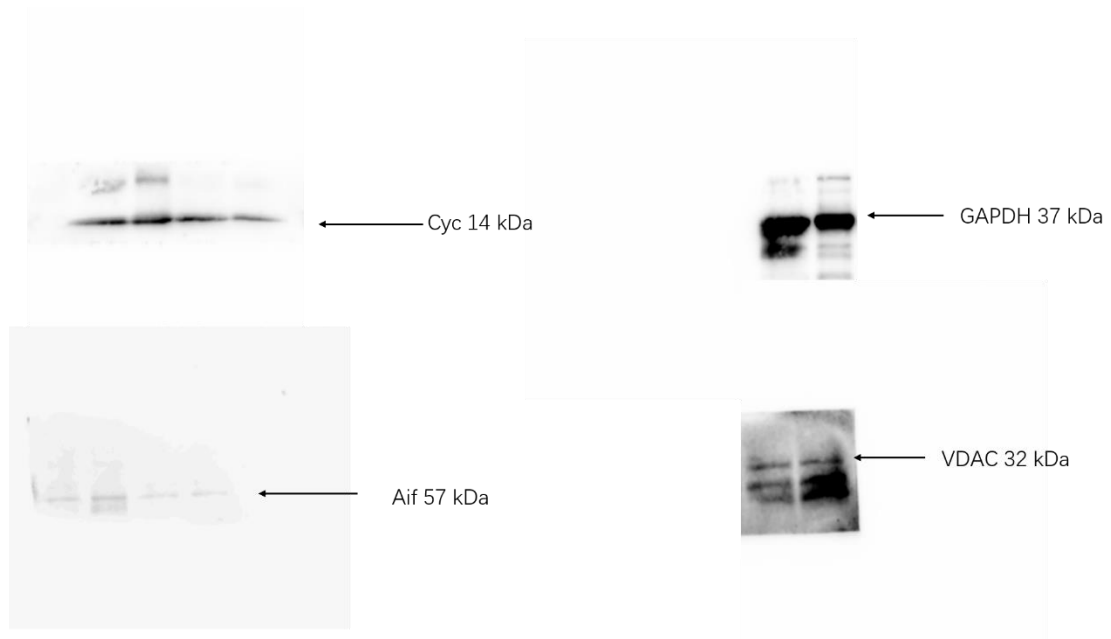

119

120 Fig S7. Uncropped blots of Fig 7g.

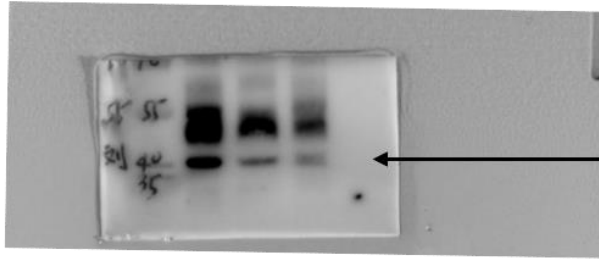

TECRL 42 kDa

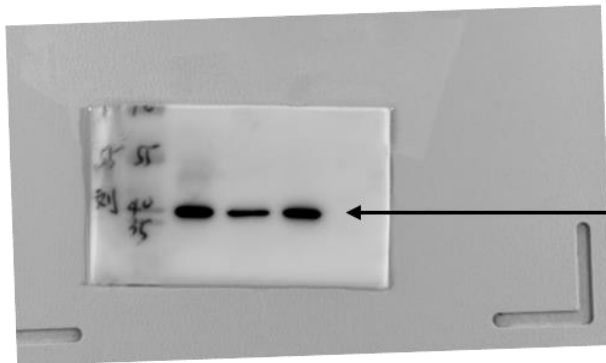

GAPDH 37 kDa

121

122 Fig S7. Uncropped blots of Fig s1c.

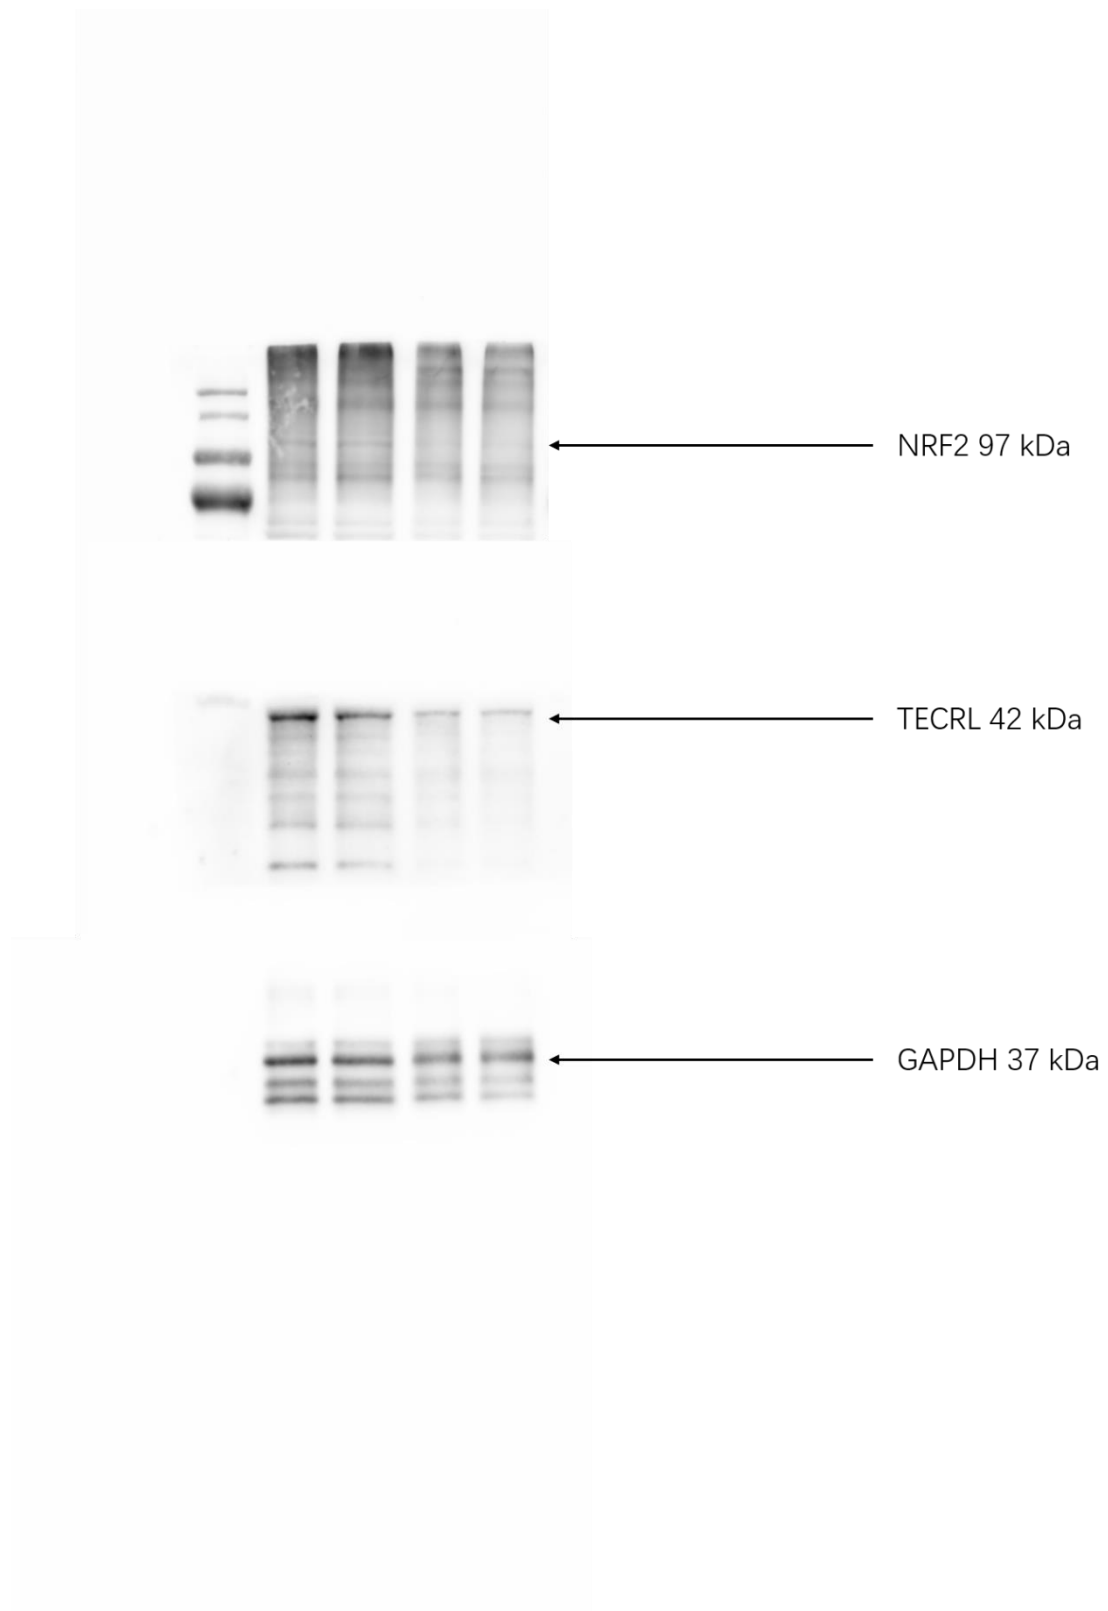

123

124 Fig S7. Uncropped blots of Fig s5a.

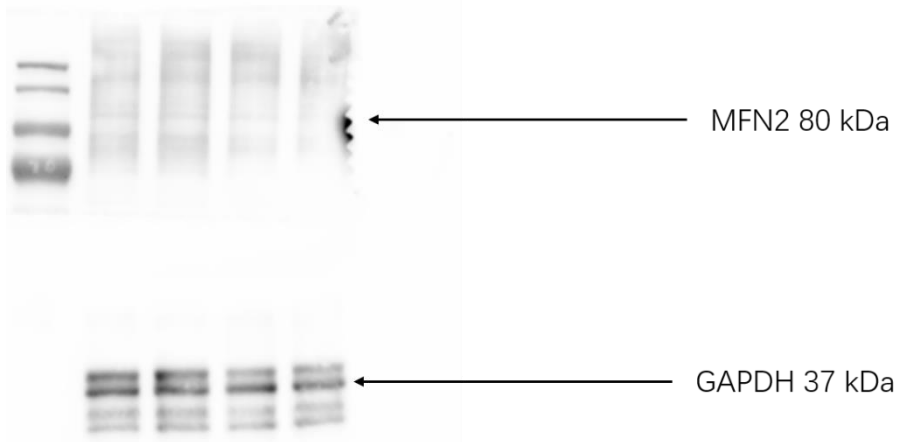

125

126 Fig S7. Uncropped blots of Fig s5b.

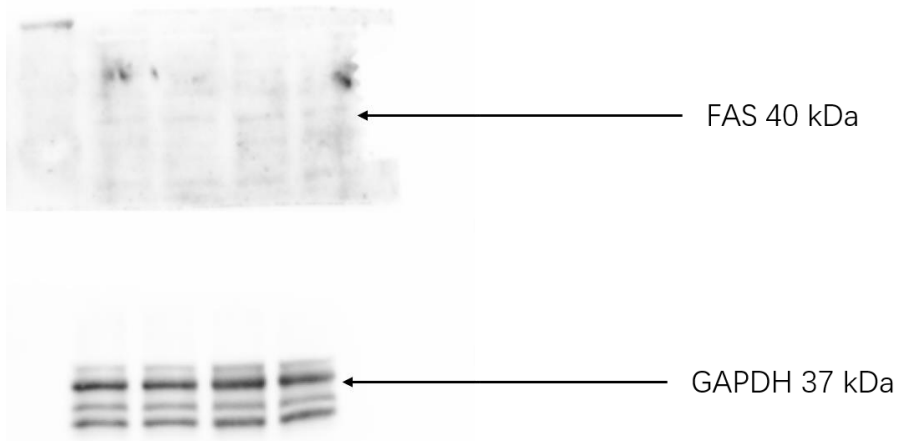

127

128 Fig S7. Uncropped blots of Fig s5c.
